# Supplementary material
Source: Elsevier journal article supplement (https://www.sciencedirect.com/science/article/pii/S2341192920300731)
Supplement: mmc1 [file S2341192920300731:mmc1.docx]

**E-COMPS:**

1.**Anexo 1. Autoría**

1. Luis M. Torres
2. Calixto Sánchez,
3. Antonio Pernía Romero,
4. Rafael García Hernández,
5. Francisco Miralles,
6. Carlos L. Errando,
7. Pablo Monedero,
8. Ignacio Velázquez,
9. Carlos Ferrando,
10. Rebeca González,
11. Vicente Domingo Triadó,
12. Ramón Peyro,
13. Elena Arregui,
14. Juan Vicente Llau,
15. Deiene Lasuen,
16. Jose Luis de la Hoz,
17. Jordi Moya,
18. Vicente Roques,
19. Carme Batet,
20. Paula Dieguez,
21. Monica Jordá,
22. Alfonso Vidal Marcos,
23. Carlos Ferrer Albiach,
24. Juan Pedro Ibor Vidal,
25. Fernando Neira,
26. Esperanza Ortigosa,
27. David Abejón,
28. Jorge Ramos,
29. Carla Iglesias Morales,
30. María López Gómez,
31. Pablo Martínez Pérez,
32. Tania García Abreu,
33. Elena Prujá,
34. Laura Cabello Gómez,
35. Milagrosa Santanagui,
36. Eduardo Concha,
37. Mª Carmen Aragón,
38. Sebastián Perales,
39. Simón Garau,
40. Rafael Badenes,
41. Marta Amat Arcos,
42. Isabel Martín Fontelles,
43. Francisco Duca Rezzulini,
44. Estefanía Cabezuelo,
45. Araceli Morales Sánchez,
46. José Luis De Córdoba Benedicto,
47. José Luis Rubio Lore,
48. Susana Bella Romera,
49. Carla Iglesias Morales,
50. Francisco Arroyo,
51. José Luis Rivas Cortés,
52. Eloísa de Blas Ugarte,
53. Cristina De Castro Gómez,
54. Javier López Aguilar,
55. Carlos Morales,
56. Álvaro Parra,
57. Idoya Orradre Burusco,
58. María Pérez Herrero,
59. Pilar Covadonga Núñez Postigo,
60. Dolores Bedmar Cruz,
61. Mª José Rodríguez Pérez,
62. Carlos Fuset Fernández,
63. Mª José Terrero,
64. Inmaculada Herrador Montiel,
65. Rogelio Sánchez de las Matas Pena,
66. Antonio Romero García,
67. Mercé Matute Crespo,
68. Hilda Luz Quispe Meléndez,
69. Yolanda Sarabia Mora,
70. Eva María Monzón Rubio,
71. José Antonio Girón Mombiela,
72. Marta Ferrandiz Mach,
73. María Ángeles Celda Moret,
74. Petra González Pérez,
75. María José Pujante Tortosa,
76. Grecco Marcelo,
77. Luis Fernández López,
78. Consuelo Rodríguez Rodríguez,
79. Alberto Velázquez,
80. Mª Carmen Ribera Montés,
81. Mª del Mar Alfonso Pérez,
82. Agustín Arranz Roa,
83. Miguel de Pedro Herráez,
84. Rafael de Alba Moreno,
85. Isabel Gragera,
86. Francisco López Martín,
87. Manuel Jesús Rico Borrego,
88. María José Vílchez Lara,
89. José María Hernández García,
90. Amaya Echevarría Hernández,
91. Wilson Astudillo Alarcón,
92. Estrella Rodríguez Agea,
93. María Borrego Costillo,
94. José Carlos Torres Mandujano,
95. Mª Luisa Tarraso Gómez,
96. Sidi Mohamed Hamida Abdelkader,
97. Mª Dolores Rodrigo,
98. Mª José González Fernández,
99. Pilar García Velasco,
100. María Pilar Acín Lázaro,
101. Marina Martín Zamorano,
102. María del Mar Hernández,
103. David Valdelamar Rosenstand,
104. Paula Arrarte Ayuso,
105. José Manuel Trinidad,
106. Luis Enrique Fernández Rodríguez,
107. Javier Martínez Vázquez De Castro,
108. Rosario Arias Cebrian,
109. Montserrat Vacas Moreira,
110. Francisco Aragón Poce,
111. Juan Romero Cotelo,
112. Enrique Borrás Rubio,
113. Genoveva Hernández Comes,
114. Mª Concepción Cassinello Ogea,
115. Josefina María Cueto Pérez,
116. Lola López Alarcón,
117. Fernando Torre Mollinedo,
118. Francisco de Borja Mugabure Bujedo,
119. Juan Manuel Vaca,
120. Carmen Jódar Casanova,
121. Pilar Plou García,
122. Virginia Morillo Macías,
123. Luis Alberto Vázquez López,
124. Salvador Ruiz Ortiz,
125. Cristina Gómez Vega,
126. Jorge Pastor Peidró,
127. Virginia Gallart Úbeda,
128. Rafael Cobos Romana,
129. José Manuel González Mesa,
130. Luisa Ortega,
131. Ana Pérez Carbonell,
132. Cristina Iglesias,
133. Sergio Sánchez Cortés,
134. Angelina Rodríguez Caballero,
135. Milagros Rivera Pérez,
136. Romualdo Gaya Serrano,
137. Isabel Delgado,
138. Carlos Prieto.
139. Alejandra Becerra,
140. Marian Navarrete,
141. Guadalupe Acedo,
142. Abraham Alayón,
143. C. Moro,
144. Elisabeth Agudelo,
145. Marta Del Valle Hoyos,
146. Carmina Pérez,
147. Sara Bejarano,
148. Rosario García,
149. Juan Manuel Prieto Setién,
150. Francisco J. Cózar de la Flor,
151. Belén Andújar,
152. Eva León,
153. María Jesús Figuero,
154. Antonio Amador,
155. Felicidad Delicado,
156. Mateo Servera Barceló,
157. Gloria Ruiz,
158. Iván Ramírez,
159. Fuensanta Meseguer Guaita,
160. Camino Rubio Artiga,
161. Paco Lafuente,
162. Mª Magdalena Truyols,
163. Beltrán Carrillo Manrique,
164. Mercé Jiménez Villa,
165. Antonio Alonso Verdugo,
166. Cristina Sifre,
167. Roció Arenal López,
168. Mª Ángeles Torres Morera,
169. María José Lillo González,
170. David Velasco Villanueva,
171. Iris de la Rocha Vedia,
172. Noelia Calvo Garci,
173. Francisco Manuel Amor Gómez,
174. Ana Belén López Sánchez,
175. Carla Muñío Ibáñez,
176. Lidia Salvador Gozalbo,
177. Mª José Hernández Cádiz,
178. Sara López Palanca,
179. Mª del Carmen León del Pino,
180. A. Javier Agulló Agulló,
181. Clara Morales Muñoz,
182. María del Pilar Millán Bueno,
183. Ángels Morales Cubero,
184. Bartolomé Fernández Torres,
185. Inmaculada Mata Tapia,
186. María Eugenia Mellado,
187. Carmen García Gaitán,
188. Paola Sáiz Sánchez,
189. Encarnación Cuéllar Obispo,
190. Raquel Rodríguez Guerrero,
191. Rosa Romero Ruiz,
192. María Pilar Pérez Navero,
193. Ana Victoria Espinosa Cuevas,
194. Paloma Baso Cerdeiriña,
195. Gema María Curado Zafra,
196. Carmen Pikar Molina Cruz,
197. Ángela María Soriano Pérez,
198. Pilar López-Toribio López,
199. Sonia Gutiérrez Jiménez,
200. Martín Bermúdez Quintana,
201. Marta Reyes Román,
202. Agustina Jiménez Castilla,
203. Eva María Guzmán Malpica,
204. Elena Pinot Amat,
205. Antonio Martínez-Amó Gámez,
206. Alfonso Duran Guzmán,
207. Pedro Caparrós Palomo,
208. Francisco Montoya Garrido,
209. Ana Segura Galdeano,
210. Victoriano Torres Fernández,
211. Celia Rodríguez-Hesles,
212. Pilar Sacristán Juárez,
213. Teresa Muñoz Martín,
214. Juan José Jerez Lanero,
215. Itahisa Cabrera Díaz,
216. Gabriel Cano Navarro,
217. Belén Oya García,
218. Francisco Álamo Tomillero,
219. Begoña Arjona Varo,
220. Laura Rodríguez Melguizo,
221. Miguel Ángel Díaz Expósito,
222. Mónica González Peláez,
223. Valle Blázquez Ruiz,
224. Laura Rodríguez Melguizo,
225. Delia Acosta García,
226. Fernando Cossío Escribano,
227. Encarnación Rey Calle,
228. María Viegas González,
229. Ana Candau Pérez,
230. Guadalupe Yerga Pozo,
231. Verónica Ruiz Zafra,
232. José María Valpuesta,
233. Ana Bella de la Calle Gil,
234. Juan Manuel Vadillo González,
235. Víctor Gracia Rodríguez,
236. Pilar Pérez Tapia,
237. Alessio Spinoni,
238. Felisa Marín Hernández,
239. Reyes Vázquez Rubio,
240. Santiago Merino Grande,
241. María Dulce Moreno Rey,
242. Diego Jarast Olivari,
243. Inmaculada Sánchez Martin,
244. Marta Reina Molina,
245. Reyes Morales Rodríguez,
246. Ana María Pérez Muñoz,
247. José Manuel Ternero Muñiz,
248. María José García Rodríguez,
249. Carmen Alícia Vargas Berenjeno,
250. María del Carmen Pérez Mateos,
251. Patricia Ramos Curado,
252. Esperanza Herrera Martin,
253. Juan Carlos Barrueco Izquierdo,
254. Fernando Caba Barrientos,
255. Raquel Ortiz de la Tabla González,
256. Pedro Díaz Serrano,
257. Cándido Ávila Gordo,
258. José Carlos Castillo Velasco,
259. Miguel Ángel Díaz Expósito,
260. Araceli Rodríguez Morillo,
261. Lourdes Olmedo Granados,
262. Marta Turmo Tejera,
263. María Pilar Gómez Reja,
264. María Jesús Sánchez Brotons,
265. Gloria Valladares Otero,
266. Rosario Picón Mesa,
267. Javier Martínez de la Ossa,
268. Juan Sánchez Peña,
269. Rosana Guerrero Domínguez,
270. Francisco Bullón Barrera,
271. Tiburcio Vázquez Gutiérrez,
272. Juan Sánchez Valderrábanos,
273. Eva Acebedo,
274. Ana Lara,
275. Manuel Sariego Ortiz,
276. Mª Ángeles Luengo Pastor,
277. Juan Fran Gómez Curiel,
278. Daniel Samper,
279. Jorge Puchol,
280. Cristina Medrano,
281. José Ramón Rodríguez Fraile,
282. Beatriz Amorós Alfonso,
283. Sonsoles Leal,
284. María José Colomina,
285. Jorge Montoro García,
286. José María Jiménez Vizuete,
287. Eva Mª Guzmán Malpica,
288. Beneharo Darias Delbey,
289. Jessica Hernández Beslmeisl,
290. Antonia Mª Verger Bennasar,
291. Fernando Cassinello,
292. Rosa Pereda Marín,
293. Juan Carlos García Collada,
294. María L. Hernández Sanz,
295. José Luis Pozo Gómez,
296. Aurelio Rodríguez,
297. Cristóbal Añez Simón,
298. María Galiana Ivars,
299. Lorena Varela Rodríguez,
300. Teresa Mantaras Ruiz- Berdejo,
301. Elena Espinosa Domínguez,
302. Paola Beatriz Vergara Ruiz,
303. Rosa Ana Álvarez Fernández,
304. Pedro Picatto Hernández,
305. Manuel A. Estrada,
306. Juan García Segovia,
307. Elena Berzal Canga,
308. Jesús Prieto,
309. Ana Fe Quintela Baizán,
310. Ana Belén Rodríguez,
311. Marta Fernández,
312. Nerea García González,
313. Carmen Fernández Seijo,
314. Carmen González Ortea,
315. Víctor Sánchez,
316. Felipe Bernardo de Quirós,
317. José López,
318. Silvia Pereiro,
319. Irene Corrales Valdivieso,
320. Andrea García Dacosta,
321. Julio Galán,
322. Gemma Cuervo,
323. Coral Merayo,
324. Ramón Trespalacios,
325. Jesús Ron,
326. Héctor Díaz,
327. Raquel Gutiérrez,
328. Rebeca González Celdrán,
329. Cristina Torre,
330. Natalia Marante,
331. Consuelo Marquina,
332. Mayo Saturno,
333. Teresa Yepes,
334. Rafael Esquinas,
335. Carmen M López,
336. Mª Dolores Velázquez,
337. Agustín M. Sarabia,
338. Victoria Martínez,
339. Isabel Fernández Acien,
340. José M. Rebollo,
341. Enrique Rubio,
342. Martín G. Muñoz,
343. Mª José Antolino,
344. Aída Blaya,
345. Kateryna Mikhno,
346. Inmaculada Bellido Estévez,
347. Aurelio Gómez Luque,
348. Montserrat Reche García,
349. María Teresa Crespo Pociello,
350. Ignacio Perpiñan Hernández,
351. Felipe Gómez Magraner,
352. Roger Sánchez Toll,
353. María Dolores Sánchez Contreras,
354. Sara Nieto Conejos,
355. Esperanza Fernández Bañuls,
356. Claudia Polo Matilla,
357. Mireia Navarro Rioja,
358. Gemma Ayas Faus,
359. Víctor González,
360. Ana Lagardera Miñana,
361. Santiago Hernández Ramis,
362. Pilar García Sáez,
363. Julia Guillén Antón,
364. David Álvarez,
365. Juan Carlos del Valle,
366. Maite Ibáñez Maríi,
367. Diego Alejandro Camargo Espitia
368. María de los Ángeles de Juan Jiménez,
369. Josué Francisco Nodarse Medina,
370. Aurora Ángela Rosa Álvarez,
371. Carlos Acuña Fernández,
372. Vanesa González Fariña,
373. Iván Paul Olavi Rojas,
374. Álvaro Viciana Maya,
375. María Alejandra Perozo Medina,
376. Montserrat Noelia Rodríguez Domínguez,
377. Miguel Ángel Marcelino Martín,
378. Kenia Martínez García,
379. María del Pilar Rubio Flórez,
380. María Del Carmen Martín Lorenzo,
381. Luis Pérez Guillama,
382. José Angel Torres Dios,
383. David Pestaña,
384. Cristina Iglesias Fernández,
385. Nuria González Jorrín,
386. Diego Alejandro Camargo,
387. Mª de los Ángeles de Juan Jiménez,
388. María Asunción Pérez San Juan,
389. Arolina Cabanas Seijas,
390. Adriana Giraudo Oldani,
391. María Aránzazu Bujanda Arizmendi,
392. Concepción Requeijo Costoyas,
393. Susana López Piñeiro,
394. José Luis Barreiro Canosa,
395. María Isabel Vidal Lopo,
396. María Doniz Campos,
397. María Durán Santomil,
398. Pilar Aguirre Puig,
399. María Jesús Álvarez Gago,
400. César Álvarez San José,
401. Luis Luna Mendoza,
402. Olga Martínez Chaves,
403. Marta Rey Alonso,
404. María Canitrot Janeiro,
405. Marian Varela Martínez,
406. María Vieito Amor,
407. Vanesa Vilanova Vázquez,
408. Elena Rojo Rodríguez,
409. Laura Alonso Prieto,
410. Miguel Angel Pereira Loureiro,
411. Iván Arean González,
412. María Ángeles Gil Campelo,
413. Isolina Castro Gómez,
414. Pedro Martínez Guitián,
415. Carla Delgado Martí,
416. Juan Carlos Carballo Alfonso,
417. María Elena Vilas Otero,
418. María del Carmen Casas García,
419. Juan José Amate Pena,
420. María Jesús Fernández Cebrián,
421. Manuel Núñez Deben,
422. Teresa Fernández Rodríguez,
423. Julia Freire González,
424. María José Lago Gestido,
425. Belén Bobillo Blanco,
426. Manuel Ignacio Tobío Rey,
427. José Ramón Reparaz Andrade,
428. Jorge Pereira Tamayo,
429. Elena Duque Novo,
430. María Teresa Otero Amoedo,
431. Luisa Blanco Tuimil,
432. María Reyes Ceresuela Gómez,
433. Mónica Mayo Moldes,
434. Rial Vidal Cristal,
435. Aurora Lamas Carballo,
436. Gustavo Illodo Miramontes,
437. Kelly Johanna Millán Rodríguez,
438. María del Carmen Corujeira Rivera,
439. Servando López,
440. Sabela del Río Fernández,
441. Leticia Gómez Viana,
442. Eva Rocha Peleteiro,
443. Jorge Juncal,
444. Ángel López Pérez,
445. Alexo Lòpez Álvarez,
446. Noelia Fernández García,
447. Enrique Domínguez Suarez,
448. Pablo Rama Maceiras,
449. Eduardo García Pascua,
450. Carlos Esteva Lorenzo,
451. Jaime Andrés Mejía Vidal,
452. María de los Ángeles Orallo Morán,
453. Fernando Hernández Zayas,
454. Juan Cardona,
455. Concepción Garrigós,
456. María González Sampedro,
457. Elena Albelda Gimeno,
458. Ángel Rodríguez Álvarez,
459. Pedro Castellano Canda,
460. Raquel Durá Navarro,
461. Ana Broseta Lleó,
462. Pilar Vicente Fernández,
463. Gustavo Fabregat Cid,
464. Francisco Martínez Peñuela,
465. José Antonio Bonal,
466. Anastasia Martínez,
467. Carlos Alonso,
468. Nuria García Gregorio,
469. Ramón Antón Torres,
470. Michael Bartz,
471. Diana Berrio,
472. Enrique Cantos,
473. Nuria Esteve,
474. Raquel Flores,
475. Javier Gil Ortega,
476. José Antonio Hoyas,
477. Natividad Más,
478. María Mercader
479. Elena Miranda,
480. Adolfo Morente,
481. José Luis Muñoz Rodes,
482. Mercedes Navarro,
483. Carlos Pico,
484. Ana Pina Ruiz,
485. Maritxu Ramírez,
486. José Román Quiles,
487. José María Ronda,
488. José Sánchez Iniesta,
489. Javier González Solís,
490. Jaime Miralles,
491. Vicent Cuquerella,
492. Marta Resalt,
493. Andoni Rascado Pérez,
494. Jesús Ángel Vicente Herrero,
495. Mary Luz Fernández Pérez,
496. Haydee Menéndez,
497. Rocío López Díez,
498. Gonzalo Rodríguez Guede,
499. Nuria Adán Valencia,
500. María Luisa Casas García,
501. Manuel González Delgado,
502. Noelia Gago Diéguez,
503. Lourdes García López,
504. María Luz Cánovas Martínez,
505. Carmen Barros Núñez,
506. Ana Belén Rodríguez Rodríguez,
507. Marta Couñago Garrido,
508. Alberto Escobar Veiga,
509. Suyin Rojas Gil,
510. Tomás Calvo Alonso,
511. Nuria Carballo Loureiro,
512. Olalla Figueiredo González,
513. África Morán Álvarez,
514. Ana Isabel Gómez Pombo,
515. María Luz Rey Sarceda,
516. Javier Juan Centeno García,
517. Marta Casalderrey Rivas,
518. Martín Bayón Gago,
519. Jackeline Lucía Carrera Sieiro,
520. Gracia Nuria Fernández Gil,
521. Lorena Mouriz Fernández,
522. María Dolores González González,
523. David García Quiroga,
524. Gloria Mariña Pernas,
525. Antía Río Gómez,
526. Milagros Cid Manzano,
527. Concepción Alonso González,
528. Belén García Arango,
529. Elena Castañón,
530. Rebeca Martín Polo,
531. Teresa Brid Castañón,
532. Gabriel Mella Pérez,
533. Laura Morante Carrión,
534. Beatriz Laserna Cocina,
535. Mª Jesús González Miranda,
536. Pablo de la Rica Fernández,
537. Juan Ramón Artamendi Suarez,
538. Marta López Pérez,
539. Covadonga Gutiérrez González,
540. Diana de la Uz Díaz,
541. Andrea Manzano Patallo,
542. Mª Luisa Posada Mesa,
543. Paz Alonso Pérez,
544. Rosa María Pereda Marín,
545. Juan Carlos García Collada,
546. Eduardo Manuel Miralles Serrano,
547. Guillermo Muñiz Mediero,
548. Magdalena Dorota Kusmierczyk,
549. Marcin Robert Zasadowski,
550. Mónica Sánchez Ortega,
551. Julio César Donadio,
552. Agustín Martínez Alcaraz,
553. Elisa Belinchón De Diego,
554. Darius Kaluza,
555. Bela Papp,
556. Julia Karpati,
557. Félix Mayor Toranzo,
558. Ana Isabel Garrote Martínez,
559. Nazario Ojeda Betancor,
560. María Vila Montañes,
561. Jorge Úbeda Pascual,
562. Elena del Val Peciña,
563. Marta María Amelburu Egoscozabal,
564. Itziar Olaizola San José,
565. María Belen Barandiaran Benito,
566. José Luis Salaverría Gómez,
567. Reyes Ortiz de Urbina González,
568. Cristina González Serrano,
569. María Dolores del Campo Martín,
570. Mari Cruz Cepeda González,
571. Berta Castellano Paulis,
572. Nagore Echeverría Rodríguez,
573. Teresa Gurrutxaga Odriozola,
574. Haritz Iraeta Oregi,
575. Ane López Montecelo,
576. Antía Osorio López,
577. Silvia González Santos,
578. María Esther Vicente García,
579. Carma Queralt Pascual,
580. Larraitz Aramburu Argandoña,
581. Inma Zubelzu Jaca,
582. Edurne Lodoso Ochoa,
583. Irene Jorge Fernández,
584. Amaia Arana Berasategui,
585. Gorka Conejero Morga,
586. Amaya Aranguren Oyarzabal,
587. Manu Azkona Andueza,
588. María Ainhoa Aginaga Badiola,
589. Eva Lamas Fernández,
590. Itziar Garmendia López,
591. Pilar Pérez Gago,
592. Elena García Retegui,
593. Larraitz Roteta Nazabal,
594. Amaia Larrea Aseguinolaza,
595. Marta Aseginolaza Pagola,
596. Amaia Uria Azpiazu,
597. Claudia Gastesi Larrañaga,
598. Consuelo García Vélez,
599. Ana Morales Quiroga,
600. Edurne Lopetegi Auzmendi,
601. María Urteaga Aldasoro,
602. Miren Chueca Bolaño,
603. Oihana Zubimendi Redondo,
604. Garazi Esturo Etxabe,
605. Idoia Gaztañaga Igarzabal,
606. Mª Victoria Arsuaga Olaechea,
607. Alazne Enparantza Aiestaran,
608. Manuel Eced Sánchez,
609. Anxo Rubin Noriega,
610. Anabel Adell Perez,
611. Yolanda Olivares Saralegui,
612. Rebeca Alcalde León,
613. Luis Jesús Esnaola Ormazabal,
614. Amaia Lopetegi Aizpurua,
615. Anna Coll Triquell,
616. Olga Cengotita Blanco,
617. Nerea de la Puente Vitini,
618. Lucia Arnaiz,
619. José Maria Carrillo Echeverría,
620. Maialen Ezquiaha Echezarreta,
621. Aitor Izeta Anza,
622. Ainhoa Garmendia Odriozola,
623. Iñigo Tranque Bizueta,
624. Cristina García Fernández,
625. María Eizaguirre Cotado,
626. Estíbaliz Berrueta Astondoa,
627. María Luz Vázquez Barreiro,
628. María Jesús Arcusa Mon,
629. Marta Awrejcewicz,
630. Sandra Verdeguer Ribes,
631. Francisca Isabel Montero Sánchez,
632. José Luis López-Prats Lucea,
633. María José Alberola Estellés,
634. Begoña Ayas Montero,
635. Mª Ángeles Pallardó López,
636. Guido Mazzinari,
637. Igor Delgado Bilbao,
638. Irene Sendino Toribios,
639. Mercedes Yero Rimbau,
640. Lorena Fernández Angulo,
641. Aizpea Bernas Albéniz,
642. Mikel Uriarte Apellániz,
643. Maite Antolín Conde,
644. Aladrén Mario,
645. Arcas Martin,
646. María Calero,
647. Elena Campillo,
648. Francisca Carpintero,
649. Ana Cuartero,
650. Jesús Cuesta,
651. Pablo Cuesta,Julián de Capadocia,
652. Luisa Charco,
653. Óscar García Blasco,
654. Beatriz García Beatriz,
655. Francisco García,
656. Flor García,
657. Ester Garrido,
658. María Garví,
659. Manuel Gerónimo,
660. Álvaro Iñiguez,
661. Carlos Jiménez,
662. Rocío Jiménez,
663. Alfonso López,
664. Belén Lozano,
665. Pascual M. Martínez,
666. Amparo Peñalver,
667. Carmen Mateo,
668. José Monsalve,
669. Encarnación Nevado,
670. Miguel Parra,
671. Juan M. Pérez,
672. M. Rubio,
673. Rosa Sánchez,
674. Antonio Saches,
675. Enrique Torcal,
676. Santiago Uña,
677. Ubaldo Vicente,
678. Mª Teresa Villar,
679. Bea Carretero,
680. Llanos Sánchez,
681. Elena Simón,
682. Carlos Martínez,
683. Jaime López Torres,
684. Pablo Calleja,
685. Laura Mínguez Luján,
686. Manuel Granell Gil,
687. Rafael García Martínez,
688. Miguel Llorca Sanchis,
689. Eva Angosto Garreta,
690. Neus Castelló Soler,
691. Ángela Sala Hernández,
692. Cristina Morell Sapena,
693. Concepción Terrades Sastre,
694. Nuria Requena Aracil,
695. Francisca Martín Escrivà,
696. Vasco Da Costa Caridade,
697. Cristina Costell Cañada,
698. Noelia Fornés Martí,
699. Elena Server Morera,
700. Juan José Arroyo Martín,
701. Patricia María Rausell Marco,
702. Vicenta Morales García,
703. María Vila Vives,
704. Paloma Trapero Revert,
705. Ana M Flóprez De la Rosa,
706. Alejandra Faus Palmer,
707. Jessica Garrido Sánchez,
708. Patricia Climent Gilabert,
709. María Ferragud Gorrita,
710. Alberto Castro Porcel,
711. Carolina Guillén Morales,
712. Joan Marc Sanvictor Soler,
713. Lucía Montilla Catalá,
714. Miriam Yuste Segarra,
715. Asun Bofi Pardo,
716. Pedro A. Martín Prieto,
717. M. Concepción Pérez Llorca,
718. Miguel Burguera Pérez,
719. Carolina Ramos Bodi,
720. Enrique López Jiménez,
721. Clara Dosset Izaguirre,
722. Eduardo Serrano Añón,
723. Ana Lledó Doménech,
724. Carmen Peiró Tudela,
725. Luis M González Pérez,
726. Sara Escudero González,
727. Carmen Monserrat Ripoll,
728. Marta Carrió Font,
729. Inés Carpí Femenía,
730. Carmen Ortega Andrés,
731. Conrado A. Mínguez Marín,
732. Maria José Gil Asensi,
733. Gabriela Játiva Guerra,
734. Patricia Galiano Sala,
735. Juan Pérez Legaz,
736. Carlos Jaramillo Tascón,
737. Marina Paz Higes,
738. Alejandro Ponce Gregorio,
739. Salima Sagatinova,
740. Ana María Valero González
741. María José Pérez Calatayud,
742. Miriam Caro García,
743. José Córdoba Gabarrón,
744. Lara Alicia Ruiz Sánchez,
745. Carolina Llorca Marco,
746. Susana Jover de Gracia,
747. Elisa Ariadna Lojo Pablo,
748. Raquel Burillo Pérez,
749. Susana Alonso Martínez,
750. María de la O Abio Calvete,
751. María Badía Martínez,
752. Kattalin Aspuru Rubio,
753. Carmen Cabrejas Gómez,
754. Noelia Astorga Molina,
755. Ana Milagros Benito López,
756. María Trinidad Cortés Franco,
757. Mª Teresa Palomino Jiménez,
758. Iñaki Roa Martínez,
759. María Encalada Cueva,
760. Armando Carlos Valdés Villanueva,
761. Marcos Fernández Cuadros,
762. Dolores Bedmar Cruz,
763. Cristina Embid Roman,
764. Cipriano Fernández Fernández,
765. Manuel J. Rodríguez López,
766. Rosalia de la Torre Liébana,
767. Alicia Alonso Cardaño,
768. Hermann Ribera,
769. Ángela Palacios,
770. Blanca Usoz Oyarzabal,
771. Milena Gobbo Montoya,
772. Alberto Vela de Toro,
773. Luis Clemente Armendáriz,
774. Rafael Torres Cueco,
775. Ignacio Zearreta Letamendia,
776. Quique Valladares Hernández,
777. Edurne Gaona Fernández,
778. Sandra Liliana Muñoz Pérez,
779. Francisco Duca Rezzulini,
780. Beatríz Martínez Larios,
781. Juan José Valverde Romera,
782. Consuelo Ibáñez Allera,
783. María Isabel Salas Fernández,
784. Manuel Guerrero Ortiz,
785. Pamela Wong Cervantes,
786. José María Hernández García,
787. Diego Díaz Rodríguez,
788. Ángeles Forner Cordero,
789. Sara Alegre Ferri,
790. Eva María Rovira Flores,
791. Francisco Javier Boned Navarro,
792. José Luis Borque Martín,
793. Gonzalo Ramos Moreno,
794. Elena Tarancón Romero,
795. Sara Visiedo Sánchez,
796. Pilar Forcada Vidal,
797. Ana Isabel Casado Merodio,
798. Natalia Peña de Buen,
799. Natalia Yolanda Pardos Domingo
800. Patricia Tejedor Vargas,
801. Juan Pablo Ortega Lahuerta,
802. Concepción Fraca Cardiel,
803. Consuelo Gómez Muñoz,
804. Pilar Herranz Andrés,
805. Roberto Carbonell Bernal,
806. Miguel Ángel García Enguita,
807. Inmaculada Gonzalo Pellicer,
808. Coral Rodríguez Calvo,
809. Blanca Izquierdo Villarroya,
810. Borja Rubio García,
811. Lucía Gallego Ligorit,
812. T. Alberto Sanjuán Villarreal,
813. Irene Molinos Arruebo,
814. Miriam Herrero Traver,
815. Jorge Vallés Torres
816. Belén Hernando Vela,
817. María Puértolas Ortega,
818. Ana Cristina García Lecina,
819. Lucia María Gimeno Garces,
820. José Mª Mateo Agudo,
821. Pilar Lanau,
822. María José Zubero Imaz,
823. Esther Cuesta Peribáñez,
824. Herminio Obón Monforte,
825. Tomás Ruíz Garcés,
826. Antonio Urieta Carpi,
827. Maria Badel Rubio,
828. Esther Polo Bardina,
829. Sara Pellejero Hinojosa,
830. Pilar Lirola Grajales,
831. Octavio Aísa Hernández,
832. Pilar Mur Campos,
833. Trinidad Cortés,
834. Marta Pedraz Natalias,
835. Beatriz Ruiz Torres,
836. Adela Villarroya González,
837. Claudia Palacios Muñoz,
838. Carlos García Marqueta,
839. María Consuelo Sebastián Pastor,
840. José Ramón Alba García,
841. María Teresa Blesa Algás,
842. Maribel Sabater Catalá,
843. Sonia Uixera Marzal,
844. Diego Díaz,
845. Alicia Margarita Souto Fernández,
846. Matilde Belén Nuñez Centeno,
847. José Luis Villar Moreira,
848. Beatriz Izquierdo González,
849. Rubén Vázquez Fernández,
850. Sergio Varela Ares,
851. Ana Yáñez López,
852. Purísima Barreto Calvo,
853. Júlia Pérez Gil,
854. Efrén García Calo,
855. Cristina Rois Vázquez,
856. Eva Estévez González,
857. Alejandra Mercedes Rey Calvete,
858. Ana Paula Bautista Guillén,
859. María de Carrillo Mantilla,
860. Álvaro Barca Buyo,
861. Diego Loscos López,
862. Mario Lahoz Montañés,
863. Laura Fores Lisbona
864. María Carbonell Romero,
865. Sergio Gil Clavero,
866. Patricia García Consuegra Tirado,
867. Laura Pradal Jarne
868. Belén Albericio Gil,
869. Galo Baclini Rodríguez,
870. María del Mar Soria Lozano,
871. Aurora Callau Calvo,
872. Concepción Pardillos Calatayud,
873. Luisa Lacosta Torrijos,
874. Fernando Gil Marín,
875. María Jesús Martin Arnal,
876. Ana Jiménez Sánchez,
877. Marta Ferrer Ferrer,
878. Ángela María Vázquez Fidalgo,
879. Pilar Garcés Mateu,
880. Natalia Giner Cucarella,
881. Aránzazu Ballester Suárez,
882. Rocío Periñán Blanco,
883. David Castillo Gómez,
884. Pablo Manuel Martínez Pérez,
885. Vicente De Sanctis,
886. María Soler Pedrola,
887. Marc J Bonet Binimelis,
888. Rosa Yáñez López,
889. Andreu Morell Gallego,
890. Gabriel Pascual Sastre,
891. Vittorio Pradella,
892. Leticia Rodríguez Vaquero,
893. Isabel Fuentes Peña,
894. Adriana d’Arienzo,
895. Miriam Baena Nadal,
896. María Eugenia Guillen Guédez,
897. Marta Alomar Bofill,
898. Concepción Segura Más,
899. Carlos Castro Arranz,
900. Raquel Peláez Romero,
901. María Dolores Mira Quirós,
902. Marta Jiménez Vidal,
903. Begoña Covas Muñoz,
904. Miriam Abdul-Karim Polo,
905. Asier Aguirre Archanco,
906. Miguel Estadé Riart,
907. Pavel Nohel,
908. Joan Mulet Mata,
909. Javier Mata Estévez,
910. Erika Ludovici,
911. Alisia Teslev,
912. Natalia Segura Sáez,
913. Vladislav Petrov Iliev,
914. José Luís Aguilar Sánchez,
915. María Inmaculada Valldeperas Hernández,
916. María del Rosario Oliva Vázquez,
917. Fernando Abad Alejaldre,
918. June Torré Blanco,
919. Antonio Díaz Fuentes,
920. Leydi De Abreu Graterol,
921. Edwin Rodríguez Luis,
922. Hans Gehrig,
923. Ignacio Gálvez Escalera,
924. Javier Ignacio Román Jimeno,
925. Javier Iborra Escalona,
926. Margalida Torres Salvà,
927. Pilar Terrasa Sagristá,
928. María José de Vicente-Tutor Alemán,
929. María Magdalena Tugores Morey,
930. María Teresa Álvarez García,
931. Elena Monterroso Garrido,
932. Grineldy Mercedes Guzmán,
933. Marta Mariscal Gil,
934. Raquel Baños Lojo,
935. Eva Martínez Martín,
936. Manuela García Romero,
937. Fernando Cosío Carreño,
938. Ana Hevia Méndez,
939. Ángeles Fernández Martínez,
940. Rosario Fernández Fernández,
941. Martín Carpintero Porrero,
942. Pilar Rubio Marauri,
943. Mª Jesús García Menéndez,
944. Verónica del Valle Ruiz,
945. Aurora Herrera Soto,
946. Rosaura Santamarina Rabanal,
947. Cristina Rodríguez Rodríguez,
948. Isabel Blanco Rodríguez,
949. Javier Albaladejo Magdalena,
950. María Menéndez Clavero,
951. Javier Carbayo Lázaro,
952. Elpidia Arija Sánchez,
953. Rodríguez Morala,
954. Covadonga Rodríguez Jiménez,
955. Raquel González Castaño,
956. Laura Pérez Arviza,
957. Martin Carpintero Porrero,
958. Virginia Gutiérrez Cabezas,
959. Mounir Fayad Fayad,
960. Ana Soriano Martínez,
961. Víctor Torres Lamberti,
962. Diego Soto Mesa,
963. Paula Delgado García,
964. Luis Argüelles Tamargo,
965. Pelayo Miranda García,
966. Beatriz Marañón Marquina,
967. Javier Cuervo Blanco,
968. Daniel Lameira Dos Santos,
969. Adam Gyorgy,
970. María Álvarez Rodríguez,
971. Pablo Gandía González,
972. María Jesús Rodríguez Dinten,
973. Enrique Rubio Gil,
974. José Manuel Prieto Gutiérrez,
975. Estefanía Peralta Espinosa,
976. Blanca Martínez Tasis,
977. José Luis Cáceres Galán,
978. Alba Violeta Gándara Carrasco,
979. Fernando Flor Parra,
980. Nuria Fernández Amigo,
981. Silvia Patricia Alconchel Gonzaga,
982. Nuria Sánchez Ramírez,
983. Victoria Carvajal Núñez,
984. Cristina Naranjo Méndez,
985. José Luis Casielles García,
986. Miguel Aísa Gasca,
987. Juan María González Valencia,
988. María Luisa Berraquero Caraballo,
989. Rafael López Soltero,
990. José Damián Bautista González,
991. Verónica Blanco Márquez,
992. María de los Ángeles Maqueda Marín,
993. Mercedes Gutiérrez Moreno,
994. Raquel Herrería Martínez,
995. José Ramón Giménez Ciruela,
996. Antonio González Ramos,
997. Jorge García García,
998. María José Navarro Iglesia,
999. Ana Rodríguez Artacho,
1000. Teresa de Jesús Roldán Rodríguez,
1001. Jorge Sánchez Lozano,
1002. Carmen Sánchez Blanco,
1003. Irene Trillo Bermudo,
1004. Francisco Javier Marqués Asín,
1005. Manuel Perozo Limones,
1006. Antonio Ramón Fernández López,
1007. Héctor Berges Gutiérrez,
1008. Eva María Morales Palma,
1009. Francisco José Carballido Pascual,
1010. Aurora González Seco,
1011. Liena Izquierdo López,
1012. Mar Cotta Galán,
1013. Amalia Soler Martínez,
1014. Beatriz Gullón Descane,
1015. Jorge Nieto Martín,
1016. Pedro Ángel Moreno Cabello,
1017. Silvia Pérez de Guzmán Torné,
1018. Diego Toro Ibáñez,
1019. Laura Gutiérrez Vázquez,
1020. María del Pino Heredia Pérez,
1021. Fernando González Yanes,
1022. Ángel Luis Meléndez Teodoro,
1023. María Repolles Pro,
1024. Victoria Eugenia Rubio Cuadrado,
1025. Rafael Muñoz Martínez,
1026. Angel Merina Cárdenas,
1027. Francisco Javier Vallejo Cantarero,
1028. Jesús Romero Martínez,
1029. Jose Luis Gómez Vázquez,
1030. Mª Ángeles Herrador Montiel,
1031. María Jesús Madina Albisua,
1032. Ángel Beriain Arcelús,
1033. Nuria Mira Jovens,
1034. Manuel Sánchez del Águila,
1035. José Antonio Yáñez Santos,
1036. Ángel Martínez Navas,
1037. Jesús Maldonado Contreras,
1038. Francisca Llobell,
1039. José Antonio Pérez Moreno,
1040. María del Mar Serna Barquero,
1041. Juan Pablo Vicente Villena,
1042. Enrique Hernández Pardo,
1043. Sara Cura Iglesias,
1044. Marina Bento Gerard,
1045. Isabel Alonso Álvarez,
1046. María Ángeles Rodríguez Navarro,
1047. Susana Sánchez Bautista,
1048. Lorenzo Sánchez Ródenas,
1049. Mercedes Benítez Jiménez,
1050. Sandra Jiménez Cano,
1051. Rocío Martín-Gil Parra,
1052. Julia Mula Leal,
1053. Lucita Dorothy Carpio López,
1054. Pedro García Romero,
1055. Nuria Domingo López,
1056. Rosario García Fernández,
1057. Joaquín Cartagena Sevilla,
1058. María José Cutillas Aulló,
1059. Roberto Fariña Castro,
1060. Miguel Lang-Lenton León,
1061. Leonardo Cabrera Ramírez,
1062. Arantxa Ramos Álamo,
1063. Julio Gómez Marrero,
1064. Oto Padron Ruiz,
1065. Miriam Jiménez Gil,
1066. Mourad Mutaz,
1067. Fabrizio Curzio,
1068. Gisela Baumann,
1069. Carolina Medina Ramírez,
1070. Carlos Ramírez Miranda,
1071. Héctor Trujillo Morales,
1072. Javier Hernández Rodríguez,
1073. Víctor Daniel Betancor,
1074. María Prats Peña,
1075. Yanira Hernández Aguiar,
1076. Sergio Cabrera Doreste,
1077. Mauricio Sanguña,
1078. Tatiana Sarmiento Trujillo,
1079. Ángel Becerra Bolaños,
1080. Rayco Rodríguez Díaz,
1081. Virginia Muiño Palomar,
1082. Adrià Carabí Gassol,
1083. Nadia Santiago Cabrera,
1084. Marcos Prados Martín,
1085. Luis Santana Ortega,
1086. Gema Hernanz Rodríguez,
1087. Laura Grosso Parrilla,
1088. Antonio Arencibia Almeida,
1089. Sergio López Ruiz,
1090. Lucía Valencia Sola,
1091. Pablo Fernández Menéndez,
1092. Pedro Jiménez Marrero,
1093. Juan José Carmona Puerto,
1094. Vanessa Suárez Romero,
1095. Miguel Caramés Álvarez,
1096. Laura Morales López,
1097. Elizabeth Guerra Hernández,
1098. Cristina Partida Figuerola,
1099. Yasser ElHadouti Gasent,
1100. Ancor Domínguez Arbelo,
1101. Jose Beleña Burgos,
1102. Mónica Múñez Murias,
1103. Yurena Domínguez Díaz,
1104. Candelaria Delgado Alonso,
1105. José Higueras,
1106. Carlos Burguera,
1107. Verónica Herraiz,
1108. Alejandro Martínez León,
1109. Concha Barrachina,
1110. Maite Richart,
1111. José M Castillo,
1112. Rocío Armero,
1113. Óscar Ramírez,
1114. Teresa Vilalta,
1115. Xavier Onrubia,
1116. Laura Lascorz,
1117. Julia Martín,
1118. Vicente Pertusa,
1119. Tania Moreno,
1120. Bruno Pérez,
1121. Juan Viñoles,
1122. Amparo Sánchez de Meràs,
1123. Javier Barrio,
1124. Raquel Higueras,
1125. José María Andreu,
1126. Estefanía Martínez,
1127. Ana Grisolía,
1128. Pilar Domingo,
1129. Pilar Viñals,
1130. Jorge Bellver,
1131. Marta Navas,
1132. Miguel Casaña,
1133. Joana Baldó,
1134. Lucía López de Ocáriz,
1135. Luisa Sapena,
1136. Daniel Paz-Martín,
1137. Sabela del Río Fernández,
1138. Néstor Fernando Salomón,
1139. Victoria González Latorre,
1140. Francisco Criado,
1141. Pablo Asensi,
1142. Alberto Parker,
1143. Mª Ángeles González Pozo,
1144. Teresa Berenguer,
1145. Jordi Sabater,
1146. Margarita Echániz,
1147. Rocío Rico,
1148. Elena Gómez,
1149. Teresa Gómez Pineda,
1150. Alberto Sánchez Valverde,
1151. Juan Luis Franco,
1152. David Ivorra,
1153. Francisco Salesa,
1154. Ana Martínez,
1155. María Spirina
1156. Marina Orozco,
1157. Marta Riera,
1158. Sergio Cabeza,
1159. Mónica Rodea Angulo,
1160. Enrique Calderón Seoane,
1161. Luis Gómez Salinas,
1162. Antonio Pimienta,
1163. Juan Florencio Morán Camberos,
1164. Nieves Luque Merino,
1165. Javier Carrasco,
1166. Consuelo García Cebrián,
1167. Ignacio Martínez Uso,
1168. Paloma Tallón Guerola,
1169. María Olivas, Paula Solís,
1170. Lorena Muñoz-Devesa,
1171. Itziar de la Cruz,
1172. Lourdes Cueva Azorín,
1173. Ana Duran,
1174. Gustavo Fabregat,
1175. Lucrecia Blasco,
1176. Pascual Ferrandis,
1177. María J. Hernandez Cádiz,
1178. María Teresa Relaño Cobian,
1179. Luis Gómez,
1180. María Galiana,
1181. Benedikt Eiden,
1182. Ana Estañ,
1183. Melania Elías,
1184. Ana Fuertes,
1185. José Luis Oliva,
1186. Alba Oltra,
1187. María García,
1188. Ana Rosa Martínez,
1189. Yolanda Sastre,
1190. Melodie Álvarez,
1191. Francisca Fornés,
1192. Elena Navarro,
1193. Silvano Arteaga,
1194. Blanca Prieto,
1195. Francisca Massó,
1196. Daniel Agudelo,
1197. Susana Valero,
1198. Ana Panadero,
1199. Elena Morales,
1200. Ángel Aguado,
1201. José María Tello,
1202. Caros Aristy,
1203. Carolina Tárraga,
1204. Carlos Ferrero,
1205. Carolina García,
1206. José Navarro,
1207. Jorge Burruezo,
1208. Cristina Yebes,
1209. Carlos Muñoz,
1210. Vicen Mayans Font,
1211. Luis Fernando Ortega Largo,
1212. Mikel Arzuaga Esquino,
1213. José Luis Gutiérrez,
1214. Zuriñe Lauzirika,
1215. Francisco Mendoza,
1216. Ramón Larrazábal, Aitziber Echevarría Agorria,
1217. Olatz Aranburu,
1218. Maria Pilar Romero,
1219. Fernando Jauregui Beraza,
1220. Arantxa Munecas,
1221. Rosa Mena,
1222. Marina Salaberría,
1223. Sonia Latorre,
1224. Eduardo Mongil,
1225. Marta Errazquin,
1226. Pilar Pérez Sánchez,
1227. Iratxe González Larrabe,
1228. Iratxe González Mendíbil,
1229. Ana Díez Padierna,
1230. Pilar Blanco,
1231. Belén Méndez,
1232. José Luis Sáez de Egilaz,
1233. Susana Postigo,
1234. Pilar Makua Biurrun,
1235. Javier Aguirre Aras,
1236. Sorkunde Telletxea Benguria,
1237. Antón Arizaga Maguregui,
1238. Filadelfo Bustos Molina,
1239. Victoria Fernández-Roldán Galán,
1240. Raúl Álvarez Aguilera,
1241. Paloma Poza Hernández,
1242. Sara Resuela Jiménez,
1243. Elisa Ávila García Heras,
1244. María Victoria Madrid González,
1245. Mª Isabel Villalobos Rico,
1246. Francisco Gómez Armenta,
1247. Julia Ferreras,
1248. Maria José Pujante Tortosa,
1249. Gema Rodríguez Cerón,
1250. Rita Pilar Rodríguez Jiménez,
1251. Alfredo Carrera González,
1252. Pilar Rubio Babiano,
1253. Mary Luz Fernández Pérez,
1254. Haydee Menéndez González,
1255. Jesús Ángel Vicente Herrero,
1256. Ana Rodríguez Velasco,
1257. Felisa Álvarez Refojo,
1258. Nieves Molins Gauna,
1259. María Jesús Martín Villanueva,
1260. Lorenza Arrighi Turri,
1261. Laura Mera Mujico,
1262. Óscar Pato López,
1263. Ana Paula Bautista Guillen,
1264. Alberto Pensado Castiñeiras,
1265. Julia Arca Suárez,
1266. Marta Diéguez Fernández,
1267. Sonia Bardanca González,
1268. Jesús Carballo Fernández,
1269. David López López,
1270. Belén Rosado Fernández,
1271. Raúl Piñeiro Lameiro,
1272. Aurora de la Iglesia López,
1273. Sara Rodiño Miranda,
1274. Noelia Curros Mata,
1275. Almudena González Pereira,
1276. Lucinda Encinar Arias,
1277. Sonia Alvarado de la Torre,
1278. Teresa Alonso Ferreira,
1279. Manuel Díaz Allegue,
1280. Ana Prado Rodríguez,
1281. Efrén García Calo,
1282. Enrique Freire Vila,
1283. Diego Ruanova Seijo,
1284. Patricia Suárez Ruiz,
1285. Socorro Martínez Puente,
1286. Pilar Blanco López,
1287. Felipe Muñoz Zurdo,
1288. Gema Rodríguez Cerón,
1289. Rita Pilar Rodríguez Jiménez,
1290. Alfredo Carrera González,
1291. Pilar Rubio Babiano,
1292. Manuel Mato,
1293. Carmen Fernández Riobo,
1294. Elena Català,
